# Supplementary material for: Magnetoreception in birds: II. Behavioural experiments concerning the cryptochrome cycle
Source: PubMed Central journal article supplement (PMC4254397; doi:10.1242/jeb.110981), 2014-12-01
Supplement: supp_217.23.4225_JEB110981.pdf [file supp_217.23.4225_JEB110981.pdf]

## Supplementary Material

### The orientation behaviour of individual birds

#### (1) Birds tested for 1 h after 1 h pre-exposure in darkness

**Table S1.** Birds tested in spring 2012

| Bird  | Control    |                   | D-G        |                   | D-T        |                   |
|-------|------------|-------------------|------------|-------------------|------------|-------------------|
|       | $\alpha_b$ | $r_b$             | $\alpha_b$ | $r_b$             | $\alpha_b$ | $r_b$             |
| 11-1  | 333°       | 0.98 <sup>A</sup> | 249°       | 0.56              | 353°       | 0.98              |
| 11-2  | 42°        | 0.77 <sup>A</sup> | 272°       | 0.43              | 29°        | 0.99              |
| 11-3  | 198°       | 0.87 <sup>A</sup> | 267°       | 0.62              | 340°       | 0.82 <sup>A</sup> |
| 11-4  | 360°       | 0.98              | 39°        | 0.88              | 15°        | 0.98              |
| 11-5  | 184°       | 0.94 <sup>A</sup> | 244°       | 0.56              | 2°         | 0.99              |
| 11-6  | 360°       | 0.96 <sup>A</sup> | 243°       | 0.09 <sup>A</sup> | 333°       | 0.22 <sup>A</sup> |
| 11-26 | 4°         | 0.95              | 116°       | 0.64 <sup>A</sup> | 9°         | 0.99              |
| 11-8  | 11°        | 1.00              | 23°        | 0.73              | 344°       | 0.83              |
| 11-9  | 346°       | 0.79              | 82°        | 0.55              | 347°       | 0.89              |
| 11-10 | 25°        | 0.50 <sup>A</sup> | 72°        | 0.94              | 354°       | 0.99 <sup>A</sup> |
| 11-11 | 6°         | 0.93 <sup>A</sup> | 314°       | 0.86 <sup>A</sup> | 336°       | 0.84 <sup>A</sup> |
| 11-12 | 7°         | 0.94              | 84°        | 1.00              | 350°       | 0.96 <sup>A</sup> |

Control, tests in 565 nm green light immediately after coming from 'white' light; D-G, D-T, tested in 565 nm green and 502 nm turquoise after 1 h pre-exposure in total darkness. -  $\alpha_b$ ,  $r_b$ , direction and length of the birds' mean vectors based on 3 recordings each, with <sup>A</sup> at the vector lengths indicating the preferred end of an axis.

**Table S2.** Birds tested in spring 2013

| Bird  | Control    |                   | D-B        |                   |
|-------|------------|-------------------|------------|-------------------|
|       | $\alpha_b$ | $r_b$             | $\alpha_b$ | $r_b$             |
| 12-1  | 19°        | 0.98              | 354°       | 0.99 <sup>A</sup> |
| 12-2  | 4°         | 0.92              | 9°         | 0.77 <sup>A</sup> |
| 12-4  | 15°        | 1.00 <sup>A</sup> | 20°        | 0.57 <sup>A</sup> |
| 12-5  | 359°       | 0.71              | 18°        | 0.97 <sup>A</sup> |
| 12-6  | 350°       | 0.74 <sup>A</sup> | 19°        | 0.93              |
| 12-7  | 14°        | 0.81              | 10°        | 0.97 <sup>A</sup> |
| 12-8  | 359°       | 1.00              | 10°        | 0.96              |
| 12-9  | 356°       | 0.83              | 7°         | 0.99              |
| 12-25 | 357°       | 0.89              | 1°         | 0.89              |
| 12-26 | 24°        | 0.84              | 10°        | 0.94              |
| 12-27 | 15°        | 0.59              | 17°        | 0.85              |
| 12-29 | 14°        | 0.65 <sup>A</sup> | 14°        | 0.94 <sup>A</sup> |

D-B, tested in 424 nm blue after 1 h pre-exposure in total darkness. Other abbreviations as in Table S1.

## (2) Birds tested twice in the same narrow-band light

**Table S3.** Bird orientation during the 1<sup>st</sup> h of the double tests

| Bird  | G = Control |                   | T          |                   | B          |                   |
|-------|-------------|-------------------|------------|-------------------|------------|-------------------|
|       | $\alpha_b$  | $r_b$             | $\alpha_b$ | $r_b$             | $\alpha_b$ | $r_b$             |
| 11-27 | 351°        | 0.93 <sup>A</sup> | 343°       | 0.08 <sup>A</sup> | 1°         | 0.60 <sup>A</sup> |
| 11-14 | 11°         | 0.98              | 26°        | 0.93              | 7°         | 0.88              |
| 11-15 | 77°         | 0.60              | 357°       | 0.90              | 8°         | 0.89              |
| 11-16 | 348°        | 0.94 <sup>A</sup> | 191°       | 0.90 <sup>A</sup> | 2°         | 0.98              |
| 11-17 | 30°         | 0.85              | 348°       | 0.48 <sup>A</sup> | 19°        | 0.99 <sup>A</sup> |
| 11-18 | 12°         | 0.98              | 18°        | 0.95 <sup>A</sup> | 22°        | 1.00              |
| 11-19 | 11°         | 0.99 <sup>A</sup> | 355°       | 0.76 <sup>A</sup> | 16°        | 1.00              |
| 11-20 | 310°        | 0.53              | 5°         | 0.98 <sup>A</sup> | 16°        | 0.95              |
| 11-21 | 19°         | 0.98              | 32°        | 0.91              | 19°        | 0.97              |
| 11-22 | 350°        | 0.79 <sup>A</sup> | 186°       | 0.74 <sup>A</sup> | 20°        | 0.52 <sup>A</sup> |
| 11-23 | 3°          | 0.97              | 15°        | 0.65              | 28°        | 0.96 <sup>A</sup> |
| 11-24 | 27°         | 0.91              | 19°        | 0.95              | 173°       | 0.87 <sup>A</sup> |

G, 565 nm green, T, 502 nm turquoise, B, 424 nm blue. Other abbreviations as in Table S1.

**Table S4.** Bird orientation during the 2<sup>nd</sup> h of the double tests

| Bird  | G-G        |                   | T-T        |                   | B-B        |                   |
|-------|------------|-------------------|------------|-------------------|------------|-------------------|
|       | $\alpha_b$ | $r_b$             | $\alpha_b$ | $r_b$             | $\alpha_b$ | $r_b$             |
| 11-27 | 286°       | 0.79 <sup>A</sup> | 8°         | 0.92              | 226°       | 0.83 <sup>A</sup> |
| 11-14 | 236°       | 0.83              | 358°       | 0.99              | 10°        | 0.82              |
| 11-15 | 243°       | 0.76              | 341°       | 0.90              | 235°       | 0.98              |
| 11-16 | 24°        | 0.75              | 8°         | 0.88              | 56°        | 0.72              |
| 11-17 | 357°       | 0.93              | 29°        | 0.60 <sup>A</sup> | 357°       | 0.92 <sup>A</sup> |
| 11-18 | 25°        | 0.74              | 345°       | 0.98 <sup>A</sup> | 17°        | 0.64 <sup>A</sup> |
| 11-19 | 185°       | 0.78 <sup>A</sup> | 8°         | 0.73 <sup>A</sup> | 19°        | 0.99              |
| 11-20 | 305°       | 0.62              | 23°        | 0.86 <sup>A</sup> | 347°       | 0.72              |
| 11-21 | 344°       | 0.37 <sup>A</sup> | 351°       | 0.93              | 8°         | 0.97              |
| 11-22 | 169°       | 0.77              | 40°        | 0.78              | 184°       | 0.90              |
| 11-23 | 1°         | 0.92              | 343°       | 0.75 <sup>A</sup> | 22°        | 1.00              |
| 11-24 | 19°        | 0.94              | 16°        | 0.96              | 171°       | 0.98 <sup>A</sup> |

Abbreviations as in Table S3.
